# Supplementary material for: Weak cubic CaSiO3 perovskite in the Earth’s mantle
Source: Springer Nature journal article supplement (doi:10.1038/s41586-021-04378-2), 2022-03-09
Supplement: MOESM1 [file 41586_2021_4378_MOESM1_ESM.xlsx]

## Sheet: CaSiO3, 1150K, this work
P (GPa)	t (GPa)	error (GPa)
38.5105	0.5464	0.02732
38.8072	0.37792	0.0189
38.8855	0.30583	0.01529
43.7713	1.24663	0.06233
43.7493	0.91655	0.04583
45.8756	0.92316	0.04616
44.4677	0.84687	0.04234
38.7179	0.64789	0.03239
45.4035	0.8732	0.04366
50.8867	2.07165	0.10358
51.5063	1.71396	0.0857
52.5184	1.80995	0.0905
56.7455	2.84121	0.14206

## Sheet: CaSiO3, 300K (Miyagi, 2009)
P (GPa)	t (GPa)
25.5	12.1
29.5	12.4
32.1	14.7
43.7	16.8
49.3	17.5

## Sheet: MgFeO, 300K, (Marq&Miy, 2015)
P (GPa)	t (GPa)
8.41809	3.01176
8.15173	2.95794
14.395	2.8532
17.7598	2.67536
19.2426	3.24628
21.2332	3.04394
20.4297	3.54795
25.85	4.6808
29.1791	5.5142
34.6865	5.13367
36.0786	6.01256
38.1768	6.43923
39.7357	6.54915
40.1226	5.97821
40.4587	6.3724
39.2128	6.34685
44.0739	7.34637
47.8835	7.20437
46.1181	7.27145
47.2688	7.28623
48.4559	7.56396
47.3192	7.33192
47.4102	7.5641
49.0755	7.57604
48.5412	7.72074
48.7456	7.84758
48.9677	8.32481
53.2529	8.34276
53.9765	8.35764
54.7036	8.79204
56.1847	8.66871
56.7189	8.78945
59.2186	9.0973
60.5016	9.3442
59.7317	9.30821
59.0669	9.1682
61.1032	9.40391
61.1793	9.51411
61.2034	9.51084
61.8073	9.63224
63.5068	9.77144
64.7106	10.0416
63.1043	9.96945
69.7815	10.3943
69.7273	10.4403
71.8817	10.8929
72.783	10.9178
73.4694	10.8963
74.6878	10.9876
75.5877	11.0048

## Sheet: MgFeO, HT, (Immoor, 2018)
P (GPa)	t (GPa)
19.6	1.96419
24.5	3.0605
27.5	3.55787
30.8	3.83867
35.1	4.49951
39.1	4.64025

## Sheet: Bm, 1150K see Methods
P (GPa)	t (GPa)
30	6.42405
31	6.69845
32	6.97285
33	7.24725
34	7.52165
35	7.79605
36	8.07045
37	8.34485
38	8.61925
39	8.89365
40	9.16805
41	9.44245
42	9.71685
43	9.99125
44	10.2657
45	10.5401
46	10.8145
47	11.0889
48	11.3633
49	11.6377
50	11.9121
51	12.1865
52	12.4609
53	12.7353
54	13.0097
55	13.2841
56	13.5585
57	13.8329
58	14.1073
59	14.3817
60	14.6561
61	14.9305
62	15.2049
63	15.4793
64	15.7537
65	16.0281
66	16.3025
67	16.5769
68	16.8513
69	17.1257
70	17.4001
71	17.6745
72	17.9489
73	18.2233
74	18.4977
75	18.7721

## Sheet: Bm, 1000K, (Couper, 2020)
P (GPa)	t (GPa)
37	5.67243
38	6.72277
39	6.19013

## Sheet: Bm, 2750K, (Girard, 2016)
P (GPa)	t (GPa)
27.5	5.5
